# Supplementary material for: Development and validation of an ultra-performance liquid chromatography method coupled with tandem mass spectrometry for determination of alizapride in human plasma
Source: Royal Society of Chemistry journal article supplement (doi:10.1039/c5ra10386j), 2015-01-01
Supplement: c5ra10386j1.pdf [file c5ra10386j1.pdf]

### The regression data and back calculated results of LLOQ

| Nominal conc (ng/ml)         | *LLOQ (1ng/mL) |       |           |        |                 |                                |                           |
|------------------------------|----------------|-------|-----------|--------|-----------------|--------------------------------|---------------------------|
|                              | ALZ            | IS    | Intercept | Slope  | Peak area ratio | Measured Concentration (ng/ml) | Nominal concentration (%) |
| 1                            | 57             | 23563 | 0.0014    | 0.0011 | 0.002           | 0.926                          | 92.641                    |
| 1                            | 54             | 20959 | 0.0015    | 0.0010 | 0.003           | 1.076                          | 107.646                   |
| 1                            | 79             | 18897 | 0.0033    | 0.0010 | 0.004           | 0.881                          | 88.056                    |
| 1                            | 78             | 19597 | 0.0031    | 0.0011 | 0.004           | 0.800                          | 80.018                    |
| 1                            | 159            | 18587 | 0.0073    | 0.0011 | 0.009           | 1.140                          | 114.033                   |
| 1                            | 189            | 18887 | 0.0087    | 0.0011 | 0.010           | 1.188                          | 118.808                   |
| N                            | 6              | 6     | 6         | 6      | 6               | 6                              | 6                         |
| <b>Mean</b>                  |                |       |           |        |                 | 1.002                          | 100.200                   |
| <b>SD</b>                    |                |       |           |        |                 | 0.155                          | 15.524                    |
| <b>CV%</b>                   |                |       |           |        |                 | <b>15.493</b>                  |                           |
| <b>Signal to Noise ratio</b> |                |       |           |        |                 | <b>24.20</b>                   |                           |

\*Calculated using six different calibration curves prepared in 6 different successive days to assure reproducibility.
