# Supplementary figures and images for: Development and validation of an ultra-performance liquid chromatography method coupled with tandem mass spectrometry for determination of alizapride in human plasma
Source: Royal Society of Chemistry journal article supplement (doi:10.1039/c5ra10386j), 2015-01-01

### Alizapride

1 ng

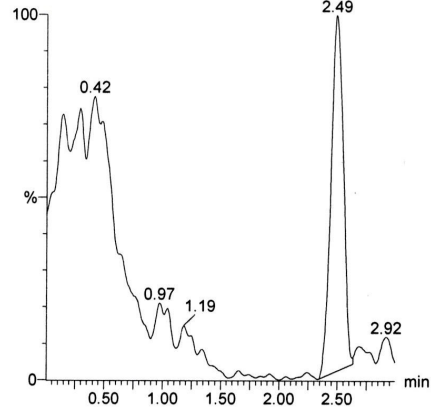

### IS

1 ng

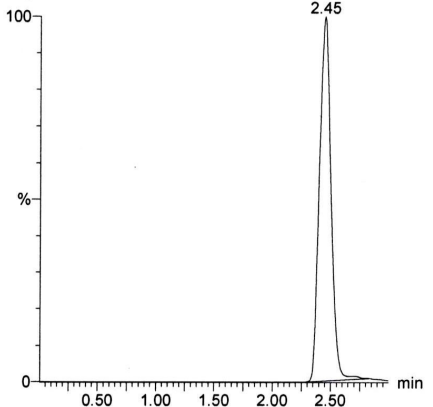

| Name       | Trace           | RT   | S/N      |
|------------|-----------------|------|----------|
| Alizapride | 316.24 > 124.19 | 2.49 | 24.198   |
| IS         | 255.16 > 180.19 | 2.45 | 7774.040 |

Supplement: c5ra10386j2.pdf [file c5ra10386j2.pdf]
